# Supplementary material for: Struggling Thermal Stress Impacts on Growth Performance and Health Status of Newly Weaned Rabbits Using Nanoemulsion of Origanum majorana Considering the Economic Efficiency of Supplementation
Source: MDPI journal article supplement (doi:10.3390/ani13111772), 2023-05-26
Supplement: s1 [file s1]

Table S1. the standards and yields of ELISA kits used in the experiment.

| ELISA Kit name | Detection Range       | Sensitivity   | Intra-assay Precision | Inter-assay Precision |
|----------------|-----------------------|---------------|-----------------------|-----------------------|
| MBS8807700     | 15.63-1000 pg/mL      | 6.5 pg/mL     | CV%<8%                | CV%<10%               |
| MBS8807589     | 0.16-10 U/mL          | 0.066 U/mL    | CV%<8%                | CV%<10%               |
| MBS9718983     |                       |               |                       |                       |
| MBS8806802     | 31.25-2000 ng/mL      | 9.15 ng/mL    | CV%<8%                | CV%<10%               |
| MBS724170      | 2.5-50ng/mL           | 0.1ng/mL      | --                    | CV%<10%               |
| MBS2601171     | 1000 pg/mL-15.6 pg/mL | Up to 5 pg/mL | <= 8%                 | <= 12%                |
| MBS7612133     | 7.813-500pg/ml        | 4.688pg/ml    | CV%<8%                | CV%<10%               |
| MBS733925      | 5-500pg/ml            | 1.0 pg/mL     |                       |                       |
